# Supplementary material for: Tracking miR-17-5p Levels following Expression of Seven Reported Target mRNAs
Source: MDPI journal article supplement (doi:10.3390/cancers14112585), 2022-05-24
Supplement: s1 [file s1]

**Figure S1.** Primer Sequences.

| Primer Name              | Sequence                                | Source / Repository   |
|--------------------------|-----------------------------------------|-----------------------|
| hsa-miR-17-5p            | 5' caaagtgcctacagtgcagg                 | Eurofins Genomics LLC |
| hsa-miR-17-3p            | 5' caaagtgcctacagtgcagg                 | Eurofins Genomics LLC |
| hsa-miR-24               | 5' tgcctactgagctgatatca                 | Eurofins Genomics LLC |
| hsa-miR-93               | 5' caaagtgcgttcgtgcagg                  | Eurofins Genomics LLC |
| hsa-miR-98               | 5' tgaggtagtaagttgtattg                 | Eurofins Genomics LLC |
| hsa-miR199a-3p           | 5' acagtagctgcacattggt                  | Eurofins Genomics LLC |
| hsa-miR-299-3p           | 5' tatgtgggatggtaaaccgc                 | Eurofins Genomics LLC |
| hsa-miR-330-3p           | 5' gcaaagcacacggcctgcag                 | Eurofins Genomics LLC |
| hsa-miR-378              | 5' ctctgactccaggctcgt                   | Eurofins Genomics LLC |
| hsa-miR491-5p            | 5' agtggggaacccctccatga                 | Eurofins Genomics LLC |
| hsa-miR-661              | 5' tgcctgggtcctcggcctgc                 | Eurofins Genomics LLC |
| hu.PTEN-UTR-F            | 5' tgaatttttttatcaagagggat              | Eurofins Genomics LLC |
| hu.PTEN-UTR-R            | 5' gtg caaa gggg tagg at gtg aac        | Eurofins Genomics LLC |
| hu.Timp2-UTR-F           | 5' ctgacatccctcctggaacagcatg            | Eurofins Genomics LLC |
| hu.Timp2-UTR-R           | 5' ccca gc tggg aga tcct aagtg ct       | Eurofins Genomics LLC |
| hu.Timp3-UTR-F           | 5' tgagcgccagaccctgccccacctac           | Eurofins Genomics LLC |
| hu.Timp3-UTR-R           | 5' ga ccttc ttaaa tgtt cc aagt gc       | Eurofins Genomics LLC |
| hu.ADCY5-UTR-F           | 5' tagcagataccagccagcggtgcc             | Eurofins Genomics LLC |
| hu.ADCY5-UTR-R           | 5' ca gaag ttg cttct gag tcaa           | Eurofins Genomics LLC |
| hu.IRS1-UTR-F            | 5' acctacctgtgttcttggaac                | Eurofins Genomics LLC |
| hu.IRS1-UTR-R            | 5' gttg at ca gggc aac tggg ca          | Eurofins Genomics LLC |
| hu.PPAR- $\alpha$ -UTR-F | 5' tgatatgg agacactgtg tatggc           | Eurofins Genomics LLC |
| hu.PPAR- $\alpha$ -UTR-R | 5' attt cca ta cgc ta cca gc at ccg     | Eurofins Genomics LLC |
| hu.STAT3-UTR-F           | 5' ggtgatga gtttcgggt gtctga            | Eurofins Genomics LLC |
| hu.STAT3-UTR-R           | 5' agg tgcc aggggg caaa gaga gaa        | Eurofins Genomics LLC |
| hu.FN-UTR-F              | 5' taaatcatcttccaatc                    | Eurofins Genomics LLC |
| hu.FN-UTR-R              | 5' t gag ct gaa gc tgg ag aa            | Eurofins Genomics LLC |
| mu.p21-F                 | 5' gtggaacttgacttcgtcacgga              | Eurofins Genomics LLC |
| mu.p21-R                 | 5' agag tg caa ga ca gcg acaa ggcc      | Eurofins Genomics LLC |
| mu.bcl2l11-F             | 5' aattgcagcctgctgagaggcctc             | Eurofins Genomics LLC |
| mu.bcl2l11-R             | 5' acc ggg aca gc agag aaga tc ttc      | Eurofins Genomics LLC |
| mu.RB1-F                 | 5' tcatctaattggacttcagagggt             | Eurofins Genomics LLC |
| mu.RB1-R                 | 5' cct aac tgg ag tgtgt ggag taac       | Eurofins Genomics LLC |
| mu.cyclinD1-F            | 5' gatgctggaggctctgtgaggagca            | Eurofins Genomics LLC |
| mu.cyclinD1-R            | 5' cgg ata gag ttgt ca gtgt aga tg      | Eurofins Genomics LLC |
| mu.NCOA3-F               | 5' agactgcagtgctgtatgatctg              | Eurofins Genomics LLC |
| mu.NCOA3-R               | 5' ca tg ac tg ccca tc att ca ga ctg    | Eurofins Genomics LLC |
| mu.PTEN-F                | 5' cgctgcctcggctgccaggcctct             | Eurofins Genomics LLC |
| mu.PTEN-R                | 5' gag gagagaga tgg ca gaag ct gc       | Eurofins Genomics LLC |
| mu.E2F1-F                | 5' catccagctcattgccaagaagtc             | Eurofins Genomics LLC |
| mu.E2F1-R                | 5' aca ta ggcc agg cgc tggg tgt cg      | Eurofins Genomics LLC |
| mu.Rbl2-F                | 5' tgctccttacacgacggtctagt              | Eurofins Genomics LLC |
| mu.Rbl2-R                | 5' tgctccttacacgacggtctagt              | Eurofins Genomics LLC |
| mu.PCAF-F                | 5' tgaaccgcatcaactactggcatc             | Eurofins Genomics LLC |
| mu.PCAF-R                | 5' gt cg tctc at ga ttgt gaaga ccg      | Eurofins Genomics LLC |
| mu.CTGF-F                | 5' catggcgtaaagccaggaagtaag             | Eurofins Genomics LLC |
| mu.CTGF-R                | 5' gacataacgttctcactttggtgg             | Eurofins Genomics LLC |
| mu.STAT3-F               | 5' ccgaccaggtagtgtctgc                  | Eurofins Genomics LLC |
| mu.STAT3-R               | 5' caatggtattgtctgcaggtcg               | Eurofins Genomics LLC |
| mu.ADCY5-F               | 5' tagcagataccagccagcggtgcc             | Eurofins Genomics LLC |
| mu.ADCY5-R               | 5' ca gaag ttg cttct gag tcaa           | Eurofins Genomics LLC |
| miR-17-genotyping F1     | 5' ccaccggtcgccaccatggtgagcaaggg        | Eurofins Genomics LLC |
| miR-17-genotyping R1     | 5' gaag aaga ttgt gcgc tcct gga cg tag  | Eurofins Genomics LLC |
| miR-17-genotyping F2     | 5' tccgctagcgctaccggactcagatct          | Eurofins Genomics LLC |
| miR-17-genotyping R2     | 5' ga cca ga tc ag tgg tctc ata ca gaag | Eurofins Genomics LLC |

**Figure S2. Potential hsa-miR-17-5p (5' CAAAGUGCUUACAGUGCAGGUAG) target sequences** (target site in blue, mutation site in red).

p21 (*CDKN1A*) (a),  
acagatg**gca cttt**gaaggg  
gttcatt**gca cttt**gattag

bcl2l11 (c),  
taga**gcactt ta**ctctgtt  
ggtaattgcc **actfta**cttg

E2F1 (d),  
ctaact**gcac ttt**cggccct  
ctccaatct**g cacttt**gatt

Rb1 (e),  
tatatcccaa gt**gcactttc** taatgtttct

Rbl2 (f),  
gag**gcacttt** agggctgtaa  
gata**gcactt t**ctacaatgt

cyclin D1 (g),  
gt**cacttta**t aagtcattgt  
caa**gcacttt** cagtccaata

NCOA3 (h),  
tgtgcagctg agt**gcacttt a**tttaaaaag  
actaa**gcact tt**gttaattt ggggggaaag

PCAF (KAT2B) (i),  
taataattag **g cacttt**tgaa aaaacaaaaa

CTGF (j),  
gaaatgtggt agcct**cactt t**aatgaaca

PTEN (b),  
atg**gcacttt** cccgtttat  
attaataaag atg**gtgaaa** cccgtttat

STAT3 (k),  
g**gcacttta** aaaatagaga  
g**gcagaaa**ta aaaatagaga

ADCY5 (l).  
tgctggtaaa attcc**cactt t**gactcagaa  
tgctggtaaa attcc**gtgaaac**actcagaa

FN,  
5' taatgttgcattaga**gcactttg**caattgc  
5' taatgttgcattaga**ggtgaaac**caattgc

TIMP3,

5' tttcttgcaaatttagcacttgggaacatttaa  
5' tttcttgcaaatttagctgaagggaacatttaa

TIMP2,

5' ccaagcaggcagcacttagggatctcc  
5' ccaagcaggcaggtgaagggatctcc

PPARα,

5' aaaactaatctgcacttttaaccttgaaaa  
5' aaaactaatctgcagaatttaaccttgaaaa

**Figure S3.** 12 selected miR-17-5p target genes.

| Gene Name                                                  | RefSeq (mRNA)                                                                | Function                                                                                                                                                                                                                                                                                                                                                                                                                                                                                                                                                                                                                                                                                                                                                                        |
|------------------------------------------------------------|------------------------------------------------------------------------------|---------------------------------------------------------------------------------------------------------------------------------------------------------------------------------------------------------------------------------------------------------------------------------------------------------------------------------------------------------------------------------------------------------------------------------------------------------------------------------------------------------------------------------------------------------------------------------------------------------------------------------------------------------------------------------------------------------------------------------------------------------------------------------|
| p21 (cyclin-dependent kinase inhibitor 1)                  | <a href="#">NM_078467</a> (human)<br><a href="#">NM_001111099</a> (mouse)    | 1.p21 is a potent <a href="#">cyclin-dependent kinase inhibitor</a> (CKI).<br>2.p21 interacts with proliferating cell nuclear antigen ( <a href="#">PCNA</a> ), a DNA polymerase accessory factor, and plays a regulatory role in S phase DNA replication and DNA damage repair.<br>3.This protein was reported to be specifically cleaved by <a href="#">CASP3-like caspases</a> , which thus leads to a dramatic activation of CDK2, and may be instrumental in the execution of <a href="#">apoptosis</a> following <a href="#">caspase</a> activation.                                                                                                                                                                                                                      |
| Phosphatase and tensin homolog (PTEN)                      | <a href="#">NM_000314</a> (human)<br><a href="#">NM_008960</a> (mouse)       | 1.PTEN protein acts as a <a href="#">phosphatase</a> to dephosphorylate <a href="#">phosphatidylinositol (3,4,5)-trisphosphate</a> (PtdIns (3,4,5)P3 or PIP3).<br>2.PTEN also has weak protein <a href="#">phosphatase</a> activity, but this activity is also crucial for its role as a <a href="#">tumor suppressor</a> .                                                                                                                                                                                                                                                                                                                                                                                                                                                     |
| Bcl-2-like protein 11 (BCL2L11)                            | <a href="#">NM_001204106</a> (human)<br><a href="#">NM_001284410</a> (mouse) | BCL-2 family members form hetero- or homodimers and act as anti- or pro- <a href="#">apoptotic</a> regulators that are involved in a wide variety of cellular activities.                                                                                                                                                                                                                                                                                                                                                                                                                                                                                                                                                                                                       |
| Transcription factor E2F1 (E2F1)                           | <a href="#">NM_005225</a> (human)<br><a href="#">NM_007891</a> (mouse)       | The E2F family plays a crucial role in the control of <a href="#">cell cycle</a> and action of <a href="#">tumor suppressor</a> proteins and is also a target of the transforming proteins of small DNA tumor viruses.                                                                                                                                                                                                                                                                                                                                                                                                                                                                                                                                                          |
| Retinoblastoma protein (Rb1)                               | <a href="#">NM_000321</a> (human)<br><a href="#">NM_009029</a> (mouse)       | RB1 play roles in regulating cell cycle, and it induce cell senescence.                                                                                                                                                                                                                                                                                                                                                                                                                                                                                                                                                                                                                                                                                                         |
| Retinoblastoma-like protein 2 (Rbl2)                       | <a href="#">NM_005611</a> (human)<br><a href="#">NM_001282000</a> (mouse)    | 1.Key regulator of entry into cell division.<br>2.Directly involved in heterochromatin formation by maintaining overall chromatin structure and, in particular, that of constitutive heterochromatin by stabilizing histone methylation.                                                                                                                                                                                                                                                                                                                                                                                                                                                                                                                                        |
| Cyclin D1                                                  | <a href="#">NM_053056</a> (human)<br><a href="#">NM_007631</a> (mouse)       | Cyclins function as regulators of CDKs ( <a href="#">Cyclin-dependent kinase</a> ). Different cyclins exhibit distinct expression and degradation patterns which contribute to the temporal coordination of each mitotic event. This cyclin forms a complex with and functions as a regulatory subunit of <a href="#">CDK4</a> or <a href="#">CDK6</a> , whose activity is required for cell cycle G1/S transition. This protein has been shown to interact with tumor suppressor protein <a href="#">Rb</a> and the expression of this gene is regulated positively by <a href="#">Rb</a> . Mutations, amplification and overexpression of this gene, which alters cell cycle progression, are observed frequently in a variety of tumors and may contribute to tumorigenesis. |
| Tumor protein p53-inducible nuclear protein 1 (TP53INP1)   | <a href="#">NM_001135733</a> (human)<br><a href="#">NM_001199105</a> (mouse) | TP53INP1 functions as a Tumor Suppressor and induces apoptosis through phosphorylating p53 at Serine-46. Multiple lines of evidence suggest that TP53INP1 gene expression is modulated by p53.                                                                                                                                                                                                                                                                                                                                                                                                                                                                                                                                                                                  |
| P300/CBP-associated factor (PCAF)                          | <a href="#">NM_003884</a> (human)<br><a href="#">NM_001190846</a> (mouse)    | <a href="#">CBP</a> and <a href="#">p300</a> are large nuclear proteins that bind to many sequence-specific factors involved in cell growth and/or differentiation, including <a href="#">c-jun</a> and the adenoviral oncoprotein E1A. The protein encoded by the PCAF gene associates with p300/CBP. It has <i>in vitro</i> and <i>in vivo</i> binding activity with CBP and p300, and competes with E1A for binding sites in p300/CBP. It has <a href="#">histone acetyl transferase</a> activity with core <a href="#">histones</a> and <a href="#">nucleosome</a> core particles, indicating that this protein plays a direct role in transcriptional regulation.                                                                                                          |
| Connective tissue growth factor (CTGF)                     | <a href="#">NM_001901</a> (human)<br><a href="#">NM_010217</a> (mouse)       | CTGF has important roles in many biological processes, including <a href="#">cell adhesion</a> , <a href="#">migration</a> , <a href="#">proliferation</a> , <a href="#">angiogenesis</a> , skeletal development, and tissue wound repair, and is critically involved in fibrotic disease and several forms of <a href="#">cancers</a> .                                                                                                                                                                                                                                                                                                                                                                                                                                        |
| Signal transducer and activator of transcription 3 (STAT3) | <a href="#">NM_003150</a> (human)<br><a href="#">NM_011486</a> (mouse)       | 1.STAT3 is a member of the <a href="#">STAT protein</a> family. In response to <a href="#">cytokines</a> and <a href="#">growth factors</a> , STAT3 is phosphorylated by receptor-associated <a href="#">Janus kinases</a> (JAK), forms homo- or heterodimers, and translocates to the cell nucleus where it acts as a <a href="#">transcription activator</a> .<br>2.STAT3 mediates the expression of a variety of genes in response to cell stimuli, and thus plays a key role in many cellular processes such as <a href="#">cell growth</a> and <a href="#">apoptosis</a>                                                                                                                                                                                                   |
| Adenylyl cyclase type 5 (ADCY5)                            | <a href="#">NM_001199642</a> (mouse)<br><a href="#">NM_001012765</a> (mouse) | This enzyme helps convert a molecule called adenosine triphosphate (ATP) to another molecule called cyclic adenosine monophosphate (cAMP).                                                                                                                                                                                                                                                                                                                                                                                                                                                                                                                                                                                                                                      |

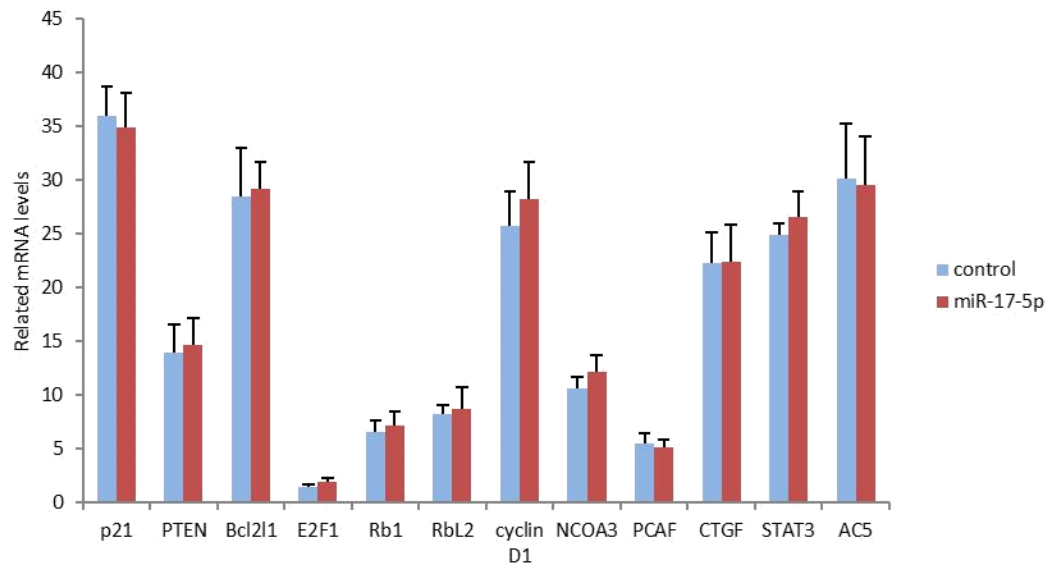

**Figure S4.** 4T1 cells were transfected with control oligo and miR-17-5p, and subjected to RT-PCR. Expression of miR-17-5p did not change p21, PTEN, bcl2l1, E2F1, Rb1, Rbl2, cyclin D1, NCOA3, PCAF, CTGF, STAT3, and ADCY5 expression at mRNA levels. \* $p < 0.05$ , \*\* $p < 0.01$  vs control; Error bars, SD;  $n = 5$ .

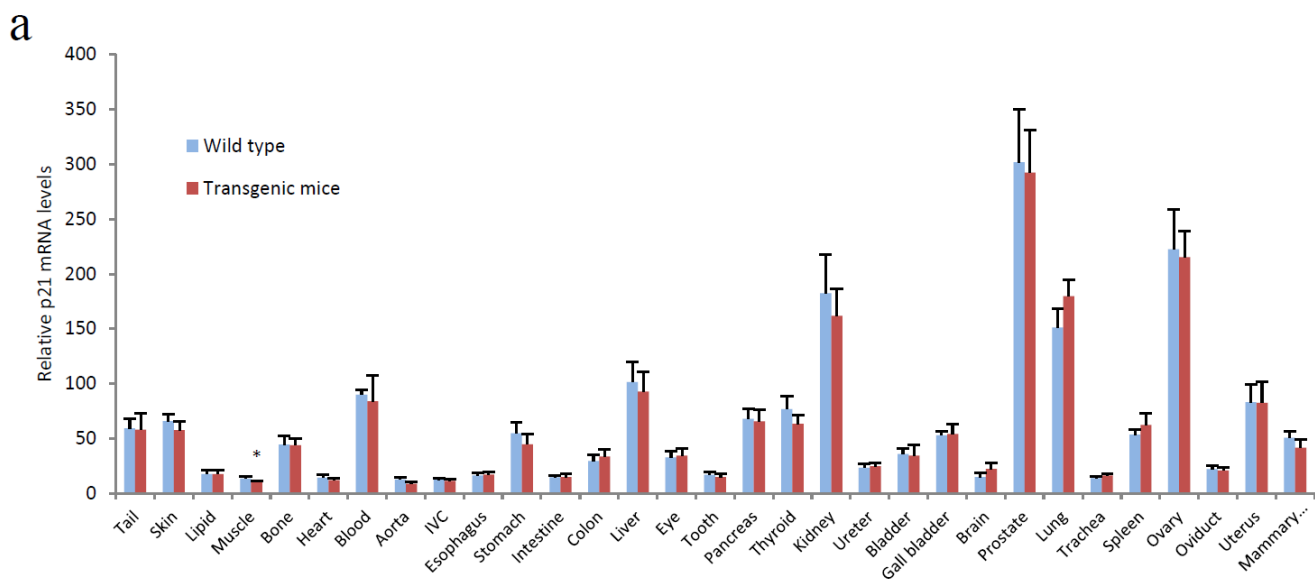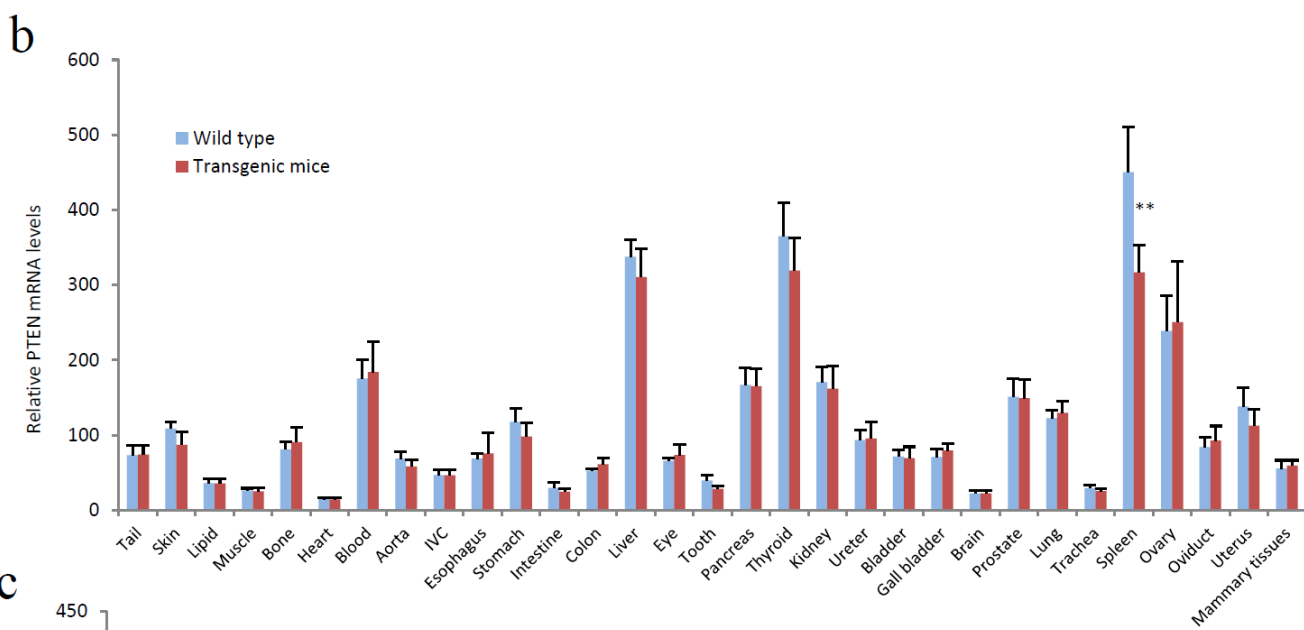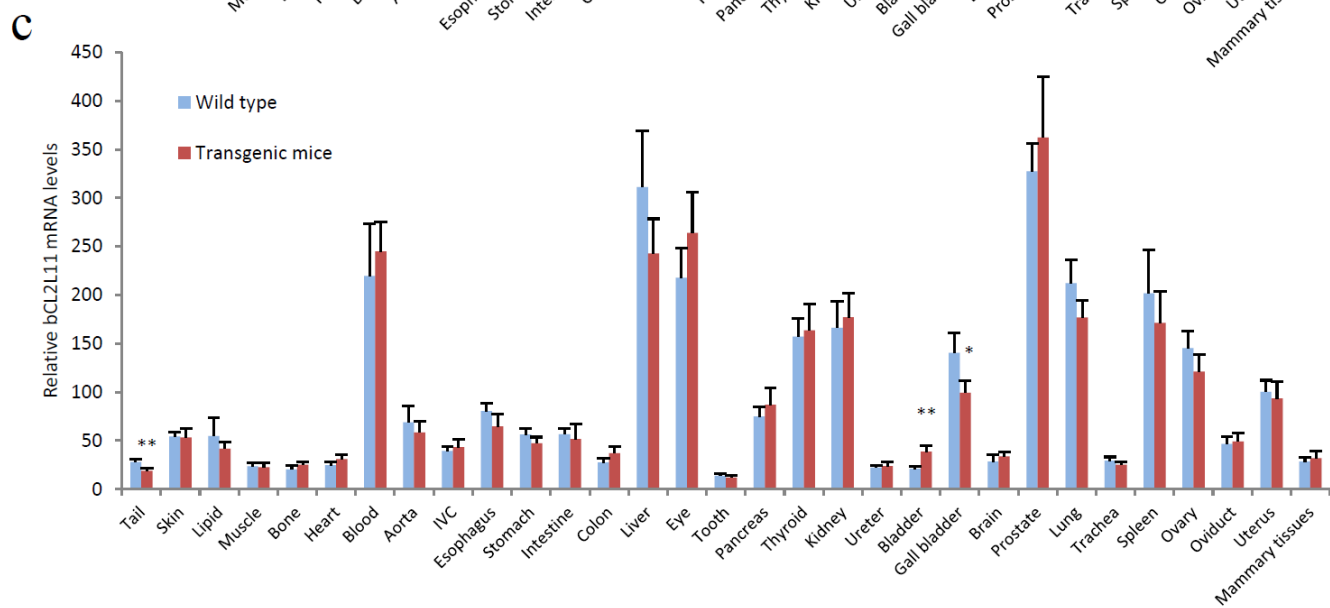

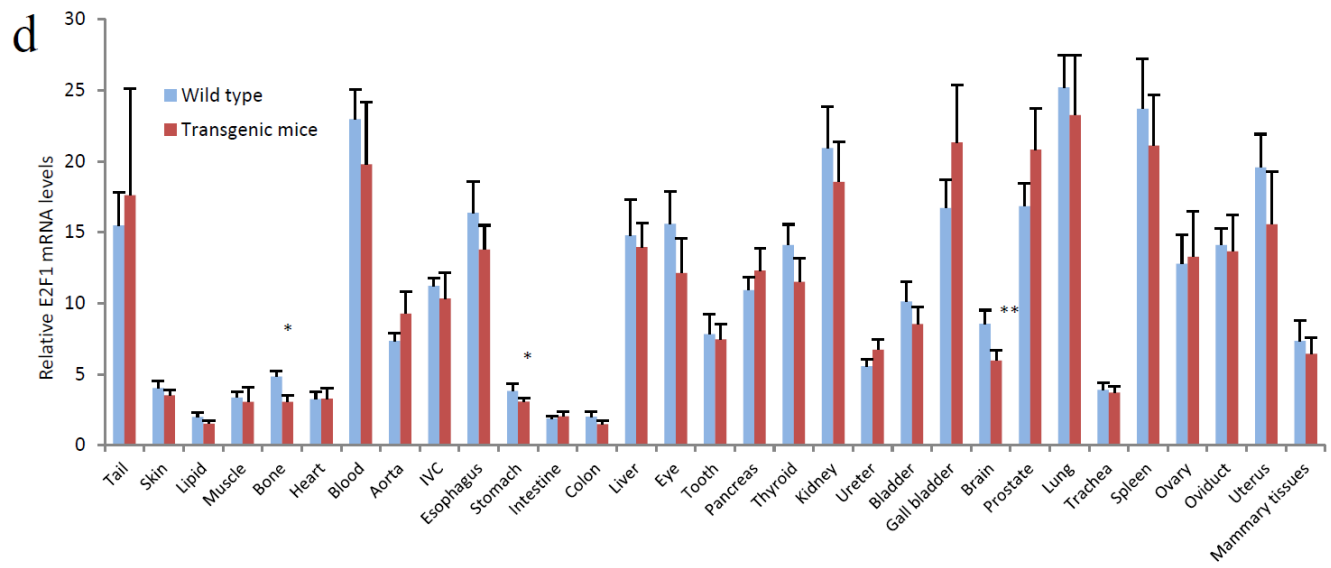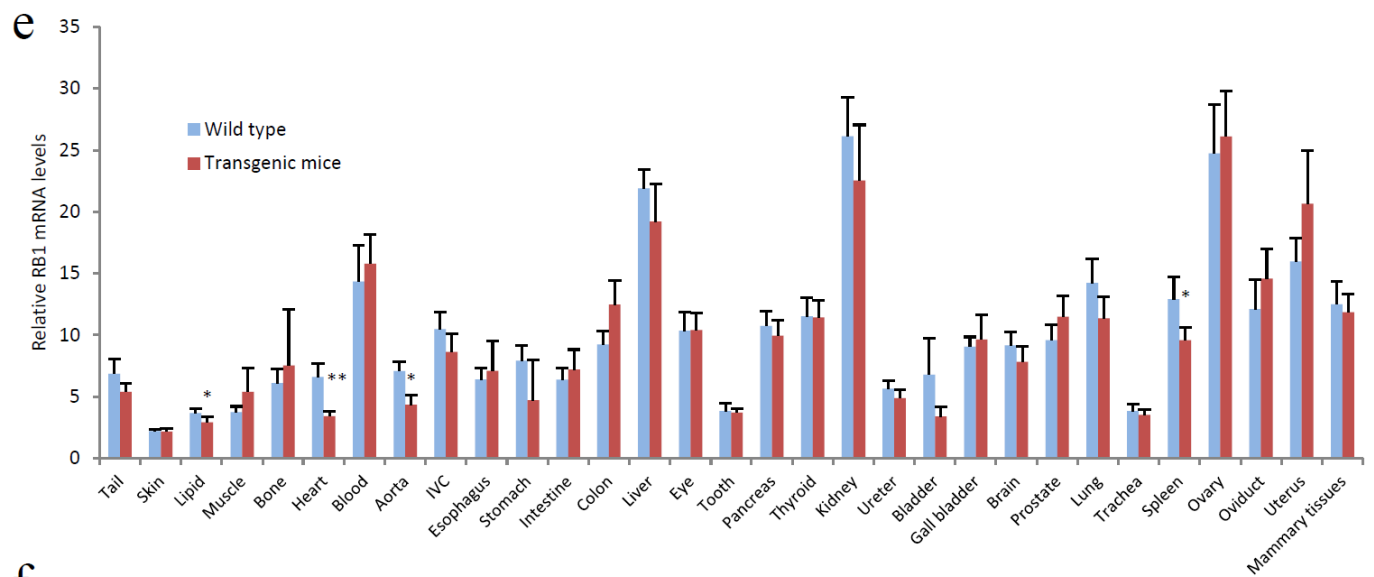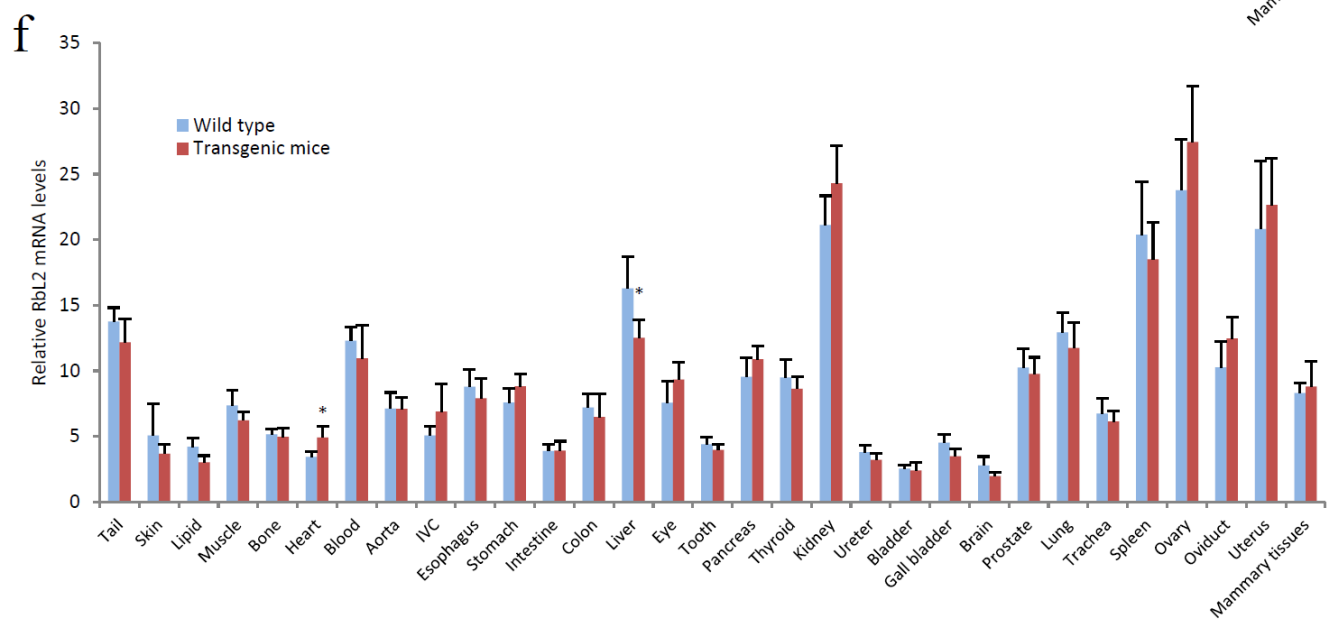

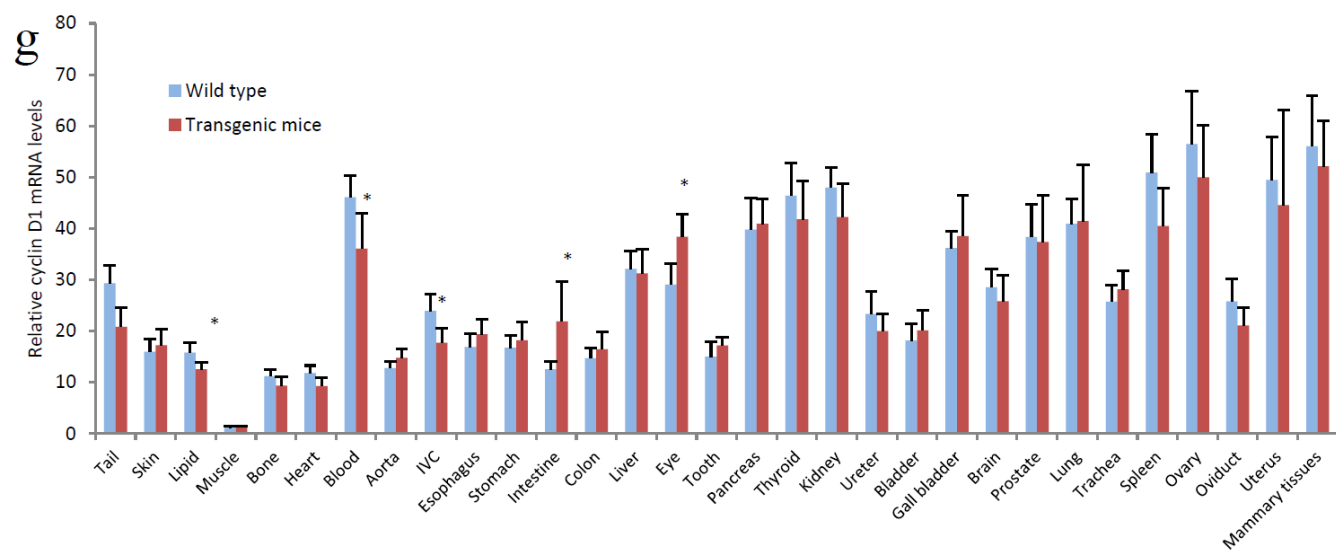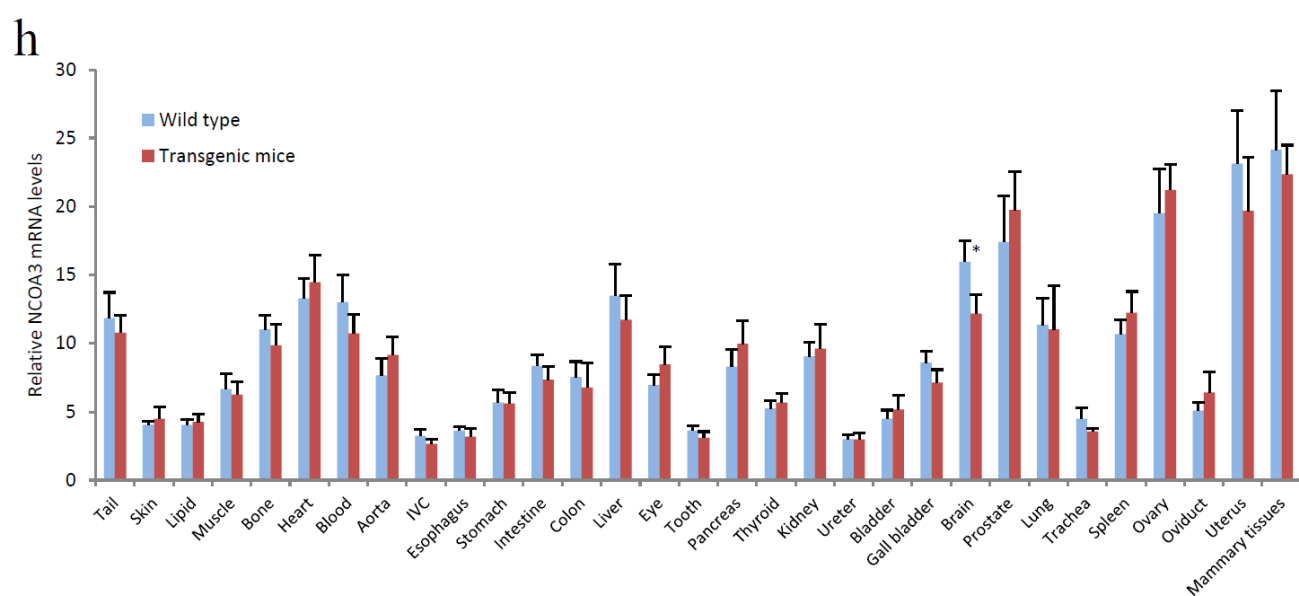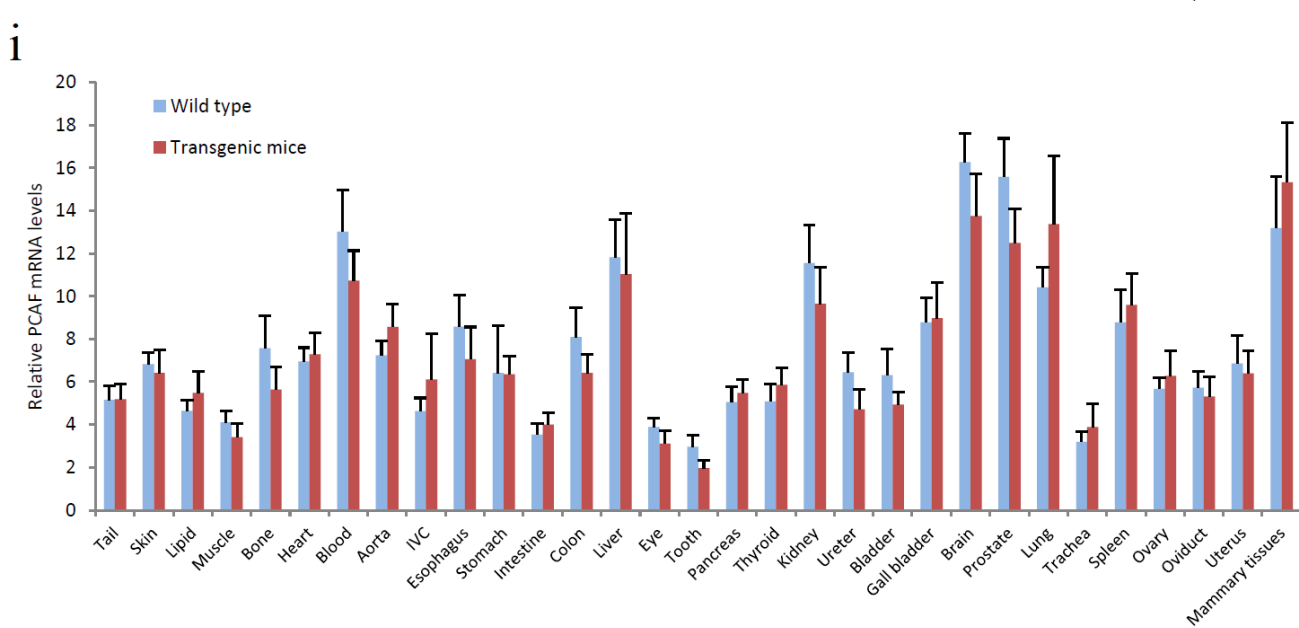



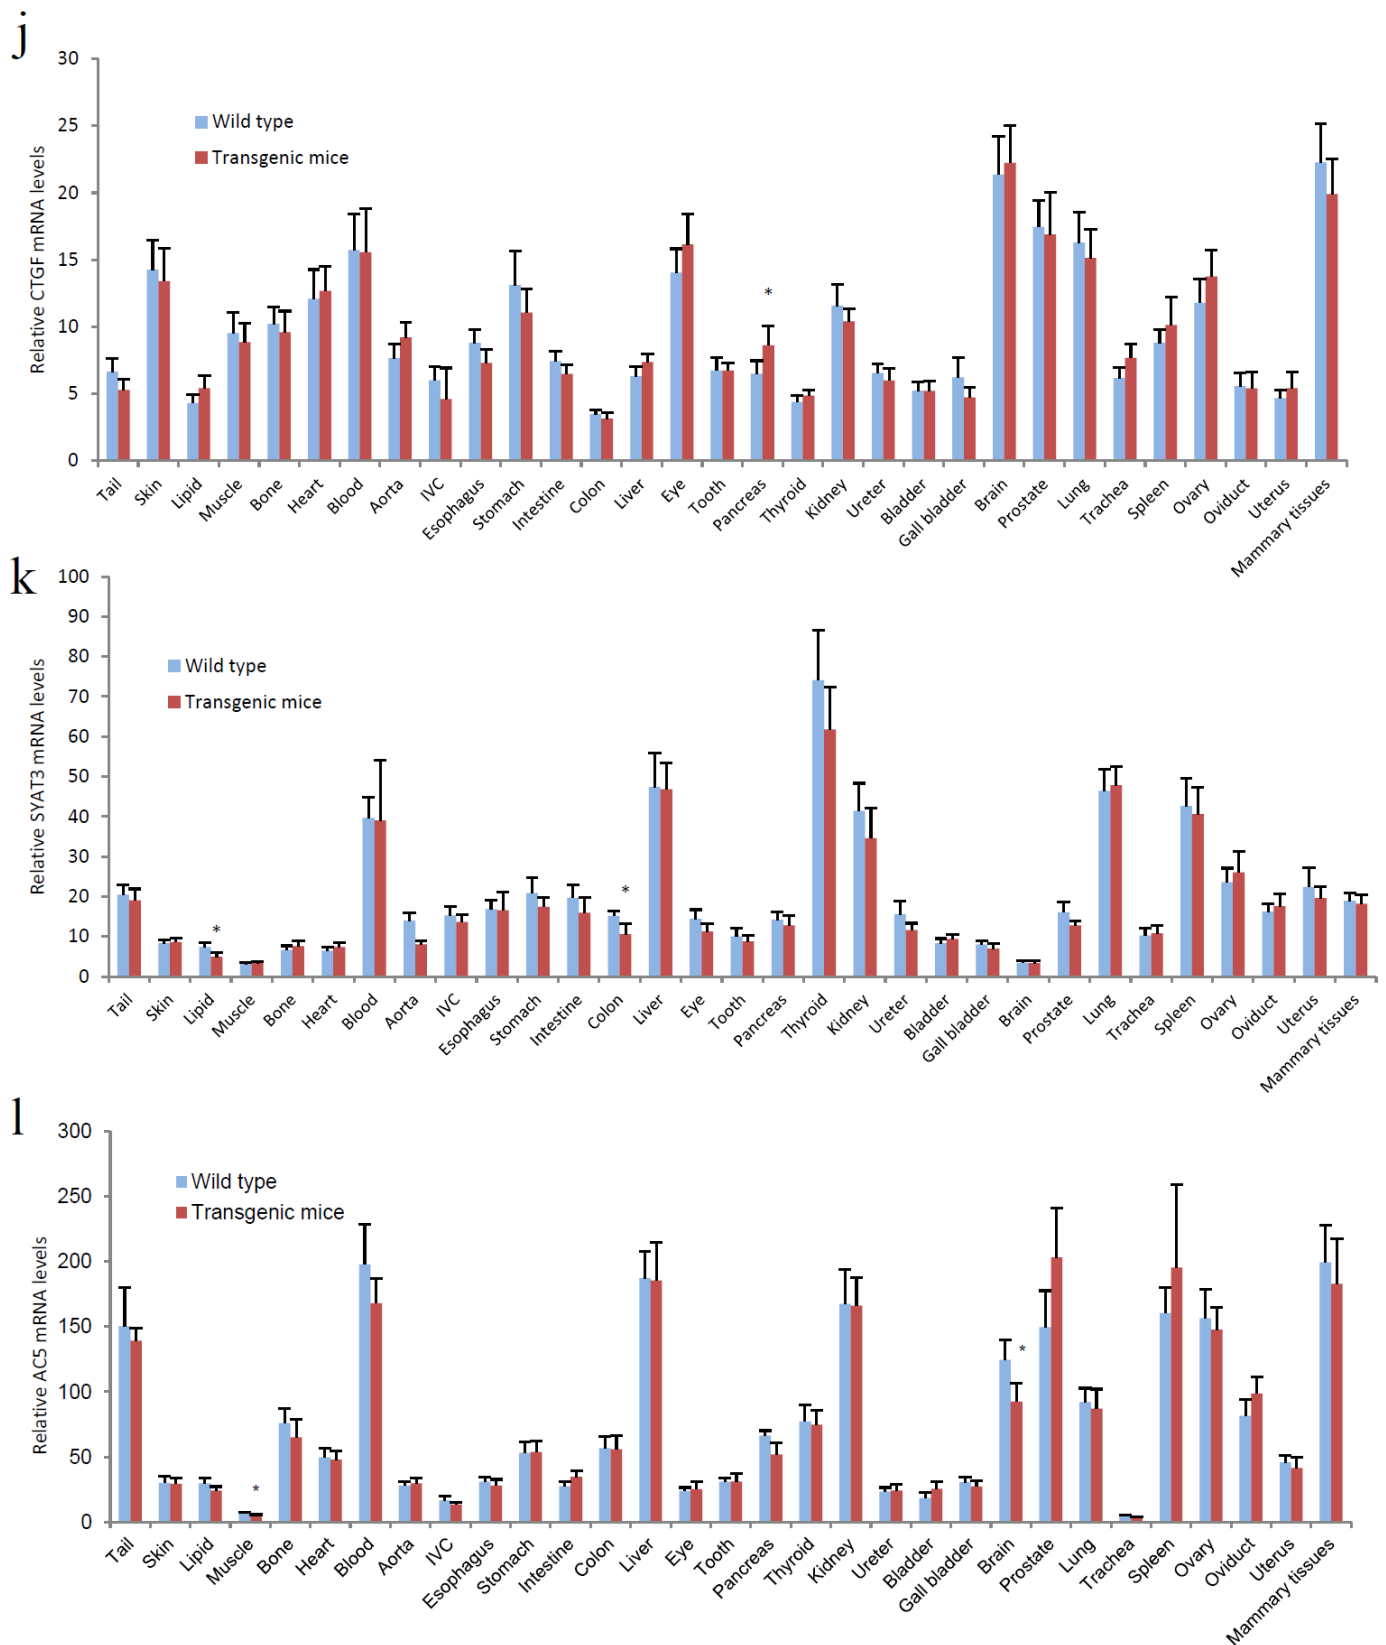

**Figure S5.** Real-time PCR using primers against 12 selected miR-17-5p target genes, including p21(a), PTEN (b), bcl2l11 (c), E2F1 (d), Rb1 (e), Rbl2 (f), cyclin D1 (g), NCOA3 (h), PCAF (i), CTGF (j), STAT3 (k), and ADCY5 (l). \* $p < 0.05$ , \*\* $p < 0.01$  vs wt; Error bars, SD;  $n = 4$ .

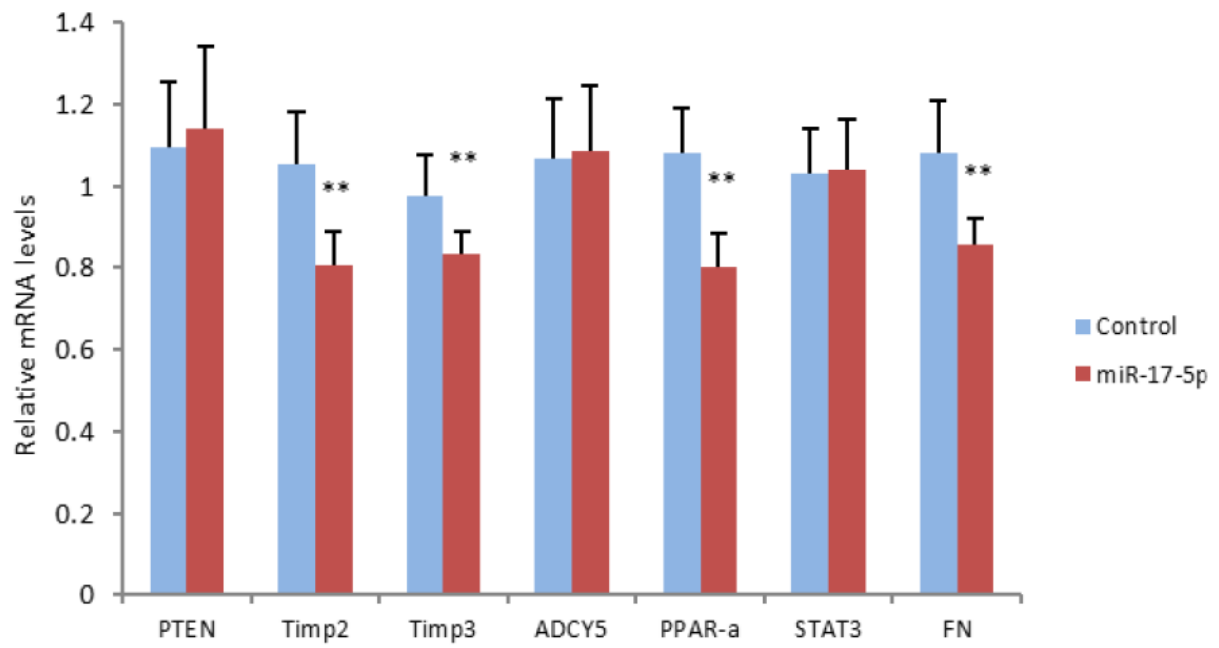

**Figure S6.** HepG2 cells were transfected with control oligo and miR-17-5p, and subjected to RT-PCR. Expression of miR-17-5p decreased Timp2, Timp3, PPAR- $\alpha$ , and Fibronectin (FN) expression on mRNA levels, but did not significantly change PTEN, ADCY5 or STAT3 mRNA levels. \*\*p<0.01 vs control; Error bars, SD; n=5.

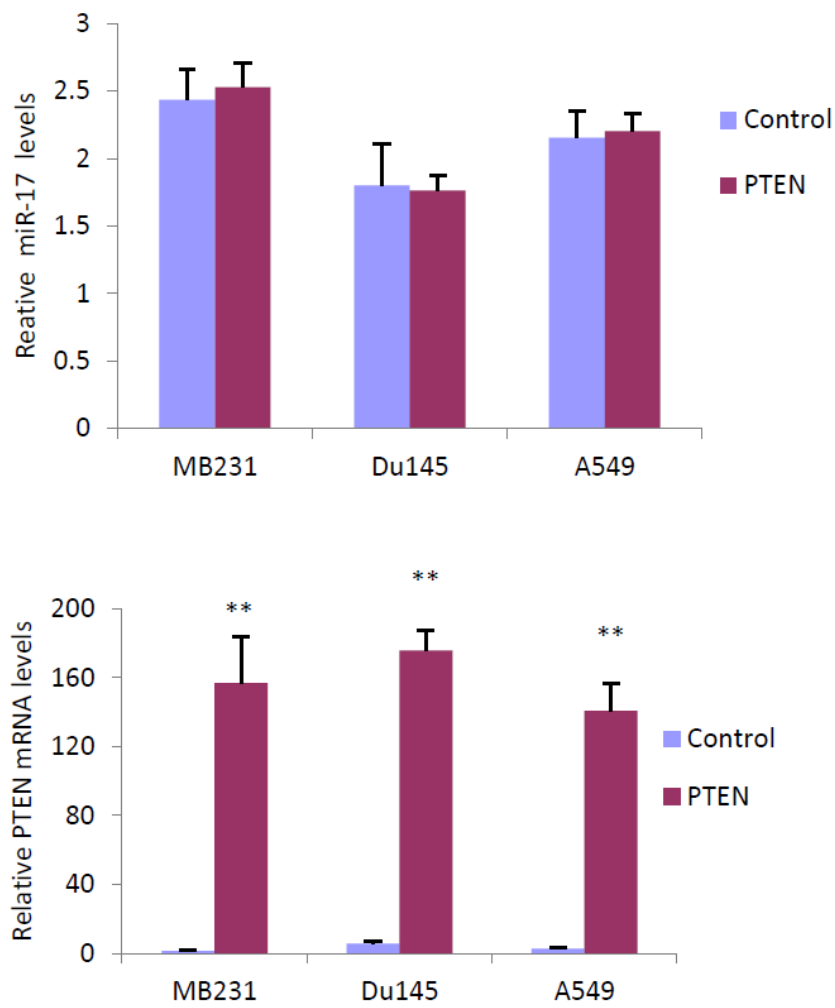

**Figure S7.** Upper, a control vector or PTEN coding sequence plasmid was transfected to breast cancer (MDA-MB-231), prostate cancer (DU145), and lung cancer cell lines (A549). The expression of PTEN coding sequence plasmid did not change miR-17-5p levels in all the cell lines used. Lower, expression of PTEN mRNA in the transfected cell lines. \*\* $p < 0.01$  vs control; Error bars, SD;  $n = 5$ .

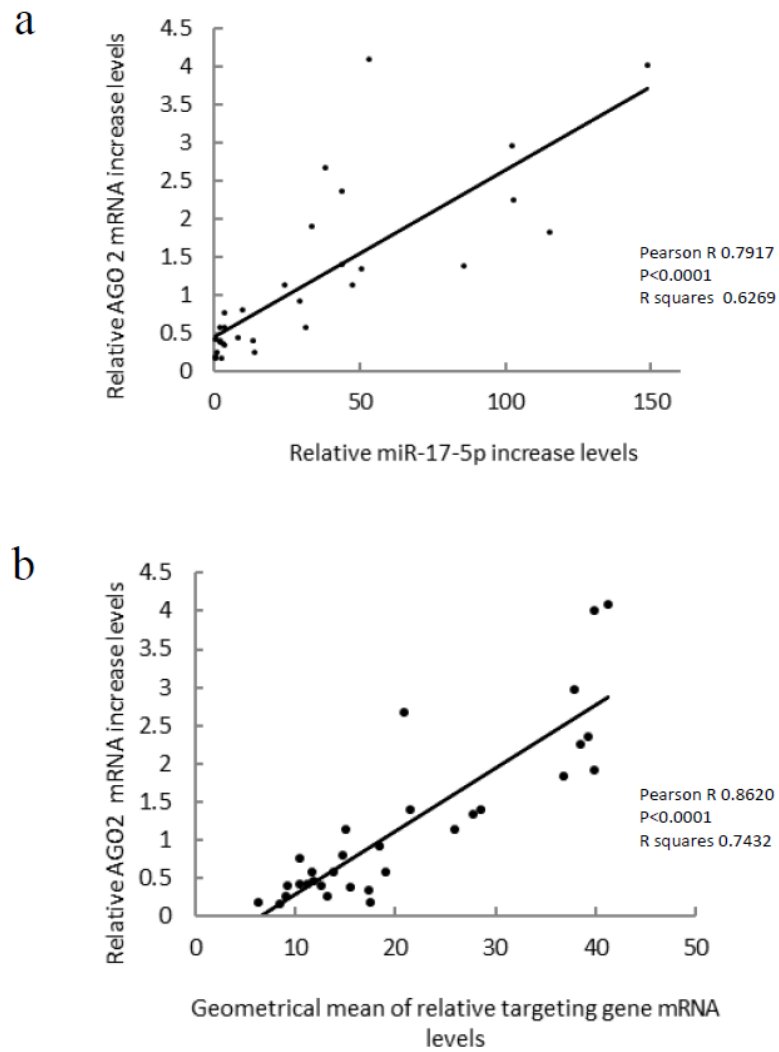

**Figure S8.** Pearson correlation (a). Pearson correlation between relative increases of AGO2 mRNA and miR-17-5p in organs of transgenic mice was analyzed by Prism 8. Pearson R=0.7917;  $p<0.0001$ ;  $n=31$ . (b). Pearson correlation between relative increases of AGO2 mRNA and geometrical mean of mRNA levels of 12 miR-17-5p target genes in organs was analyzed by Prism 8. Fold AGO2 mRNA was positively correlated with geometrical mean of mRNA levels of these 12 miR-17-5p target genes. Pearson R=0.8620;  $p<0.0001$ ;  $n=31$ .

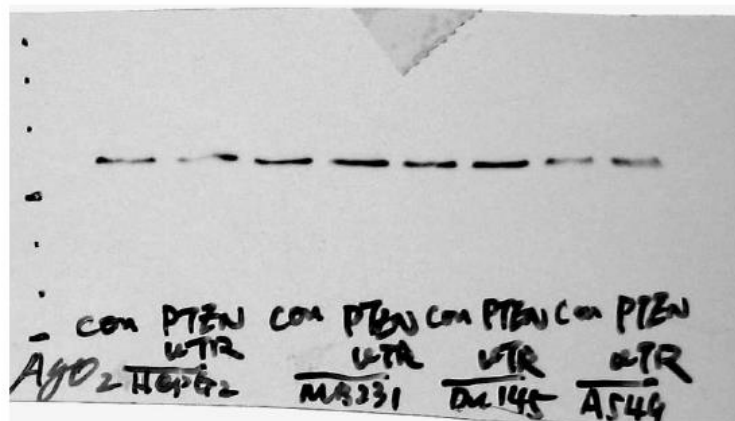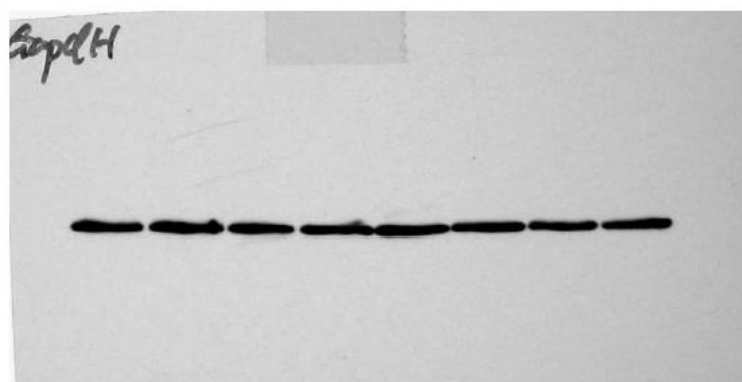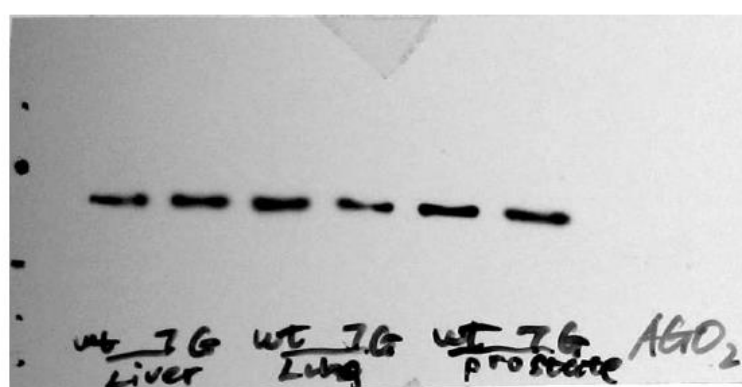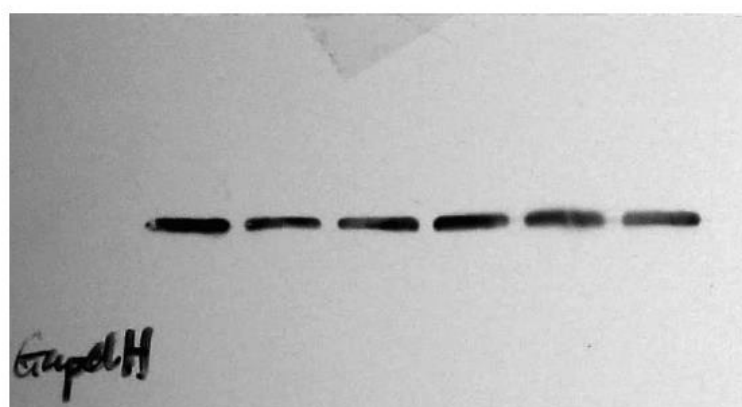

Figure S9. Full gel photos of Western blots.
